# Supplementary material for: Identification of germline transcriptional regulatory elements in Aedes aegypti
Source: PubMed Central journal article supplement — Sci Rep. 2014 Feb 4;4:3954. doi: 10.1038/srep03954 (PMC3912481; doi:10.1038/srep03954), 2014-02-04
Supplement: srep03954-s1.pdf [file srep03954-s1.pdf]

# Supplementary Table 1

|         |                                                                       |
|---------|-----------------------------------------------------------------------|
| Rib-F   | AAGCCATGGGATGATGAAAC                                                  |
| Rib-R   | AGCTCATCGACGGAAACCT                                                   |
| GFP-R   | CTCGCCCTTGCTACCCAT                                                    |
| 923-F   | CGTGATCGCGAGATAAGTT                                                   |
| 10097-F | CACAAACGGGTCGCTAAAAG                                                  |
| 7584-F  | GTTGATCCGGGGTTTGTC                                                    |
| 7097-F  | ATTGAACTACTATCCAGAGA                                                  |
| Avasa-F | GCGCGAAGTGATCTGAACT                                                   |
| 601A    | GCTTATCGAATACGCGTACGGCGCGCCGAAGCTCTGTTCATATACAGCGACAATTATATAG         |
| 601B    | CCACCCCGGTGAACAGCTCCTCGCCCTTGCTCACCATCTTCAAACTTATCTCGCGATCACG         |
| 601C    | CCGCCTAATCGATCGCGTGATCGCGAGATAAGTTTTGAAGATGGTGAGCAAGGGCGAGGA          |
| 601D    | AACATACACTTTGAATATACACATATATACGAACTATTTACTTGTACAGCTCGTCCATGCC         |
| 593A.2  | ATGTATCTTAAAGCTTATCGAATACGCGTACGGCGCGCCCGTCGTCAGTTATGGCGATGATGAT      |
| 593B    | CCCGGTGAACAGCTCCTCGCCCTTGCTCACCATTTTCACTCTGTAGACAAAAGATAACCT          |
| 593C    | TGGGATAAAAGAGGTTATCTTTTGTCTACAGAGTGAAAATGGTGAGCAAGGGCGAGGAGC          |
| 593D    | GAACATAAAGAGAGAGCGCGCCGTGTGAATTCTGCCGCTTACTTGTACAGCTCGTCCATGCCG       |
| 593E    | CCGCCGCCGGGATCACTCTCGGCATGGACGAGCTGTACAAGTAAGCGGCAGAATTCACACGGC       |
| 593F    | ATTTTGACGTCGACGAGATCGGCCGGCCTAGGCGCGCCAACGCATGTCGCTTTCATCGAAA         |
| 592A    | TTAAAGCTTATCGAATACGCGTACGGCGCGCCTCACCCGAAATTACGGTACTTATGATCA          |
| 592B    | CCCGGTGAACAGCTCCTCGCCCTTGCTCACCATGCCTGTGATAATGCGAAAAAACATTTT          |
| 592C    | AAAATATTCAAAAATGTTTTTTCGCATTATCACAGGCATGGTGAGCAAGGGCGAGGAGC           |
| 602F    | GTGATTTTGACGTCGACGAGATCGGCCGGCCTAGGCGCGCCGGTTCGACTGATCATAATCAGCCATACC |
| 591A    | CAATGTATCTTAAAGCTTATCGAATACGCGTACGGCGCGCCACGTTTTTGTGCGCTCCGGG         |
| 591B    | ACCCCGGTGAACAGCTCCTCGCCCTTGCTCACCATTTGGATTTTGGACACTTATTAACACA         |
| 591C    | GTTTTAAATAAGTGTGTTAATAAGTGTCCAAAATCCAAATGGTGAGCAAGGGCGAGGAGC          |
